# Supplementary material
Source: publisher figshare collection journal article supplement (https://frontiersin.figshare.com/ndownloader/files/29172129)
Supplement: Supplementary file 1 [file 29172129]

## Sheet: Hoja1
Supplementary Table 4 Counts of all dinoflagellate cyst taxa identified in this study. Number of cyst types (richness) per sample is shown on the right (full+empty).
Sampling sites	Alex-type (full)	Archaeperidinium minutum (empty )	Brigantedinium sp. (full)	Brigantedinium sp. (empty)	Protoperidinium avellana (empty)	Protomeridinium conicoides (empty)	cf. Diplopsalis-type (empty)	Dubridinium caperatum (full)	Dubridinium sp. (empty)	Echinidinium aculeatum (empty)	Echinidinium granulatum/delicatum (empty)	Echinidinium transparantum (empty)	cf. Ensiculifera tyrrhenica (full)	cf. Ensiculifera tyrrhenica (empty)	Gymnodinium catenatum (full)	Gymnodinium catenatum (empty)	Gymnodinium nolleri/microreticulatum (empty)	Gymnodinium microreticulatum (full)	Gymnodinium microreticulatum (empty)	Impagidinium sp. (empty)	I. aculeatum (empty)	I. paradoxum (empty)	Lejeunecysta oliva (empty)	L. cf. sabrina (full)	L. cf. sabrina (empty)	Lejeunecysta/Quinquecuspis (empty)	Lingulodiniumpolyedra (empty)	Polykrikoskofoidii (empty)	P. schwartzii (empty)	Protoceratium reticulatum (full)	Protoceratium reticulatum (empty)	Protoperidinium americanum (full)	Protoperidinium americanum (empty)	P. conicum (full)	P. conicum (empty)	P. divaricatum (empty)	cf. P. monospinum (empty )	P. shanghaiense (full)	P. shanghaiense (empty)	P. stellatum (empty)	P. subinerme (full)	P. subinerme (empty)	Pyrophacus steinii (empty)	Quinquecuspis concreta (empty)	Scripsiella cf. trochoidea (full)	Scripsiella cf. trochoidea (empty)	Sphaerical-type (cf. calcareus cyst) (full)	Sphaerical-type (cf. calcareus cyst) (empty)	Spiniferites sp. (full)
B91	2	0	0	16	0	0	2	2	16	0	0	1	0	0	0	20	3	0	0	0	0	0	0	0	5	0	4	0	0	0	0	2	7	3	4	0	0	0	3	0	0	1	0	3	2	0	0	0	0
B67	0	0	0	0	0	0	0	0	1	0	0	0	0	0	0	0	1	0	0	0	0	0	0	0	0	2	0	0	0	0	1	0	0	0	0	0	0	0	1	0	0	1	0	1	0	0	0	0	2
B68	2	0	0	12	0	0	0	0	0	0	0	0	0	0	0	43	3	1	0	0	0	0	0	0	0	0	5	0	0	0	16	0	10	0	1	0	0	0	1	0	0	1	0	5	0	1	0	0	0
B69	0	0	0	40	0	0	0	0	25	0	0	0	1	0	0	104	5	0	12	0	0	1	0	0	0	7	33	0	0	0	87	0	27	0	1	0	2	0	1	0	0	3	1	12	3	1	0	0	0
B66	1	0	0	8	0	0	4	0	5	0	1	0	0	0	0	10	1	0	2	0	0	0	0	0	1	6	7	2	0	0	17	0	1	0	6	0	0	0	0	0	0	2	0	0	0	0	0	0	3
B65	0	0	0	36	0	0	1	0	7	0	0	0	0	0	0	24	6	0	0	0	0	0	0	0	0	17	2	0	0	0	13	0	7	0	0	0	0	0	3	0	1	8	0	0	0	0	0	0	1
B64	3	0	2	7	0	0	0	0	11	0	0	1	0	0	0	51	5	0	2	0	1	0	0	0	0	27	28	3	0	0	74	1	8	0	4	2	0	0	2	0	1	2	0	0	0	0	0	0	0
B63	3	0	0	58	0	0	0	0	48	0	1	0	0	0	0	184	19	0	15	1	0	0	2	0	0	86	168	18	0	0	333	0	21	0	14	1	0	0	15	1	0	17	0	0	0	0	0	0	0
B83	3	0	0	8	0	0	0	0	9	0	2	0	0	0	0	23	5	1	6	0	0	0	1	0	0	23	56	3	0	0	132	0	0	0	2	2	0	0	8	0	0	2	0	0	0	0	0	0	0
B82	0	0	0	10	0	0	0	0	13	0	2	0	0	0	0	27	3	0	3	1	0	0	0	0	0	23	49	2	0	0	57	0	6	0	3	0	0	0	7	0	0	3	0	0	0	0	0	0	0
B90	0	0	0	15	0	0	10	0	26	0	0	0	0	0	0	47	0	0	0	0	0	0	0	0	13	4	3	0	0	0	1	0	0	0	1	0	0	0	1	0	0	6	0	0	1	0	0	0	0
B49	1	0	0	6	0	0	5	0	8	0	0	0	0	0	0	26	10	0	0	0	0	0	0	0	0	0	0	1	0	0	1	0	3	0	0	0	0	0	0	0	0	3	0	3	0	0	0	0	0
B50	3	0	2	31	0	0	6	1	49	1	0	0	3	0	0	60	1	0	3	2	0	0	0	0	0	9	21	1	2	0	69	1	8	0	6	2	0	0	2	0	0	2	0	25	0	0	0	0	0
B51	0	0	5	32	0	0	12	0	34	0	0	0	2	0	0	103	0	0	16	0	0	0	0	0	0	13	0	0	0	0	97	1	26	0	2	0	0	0	1	0	1	7	0	16	6	0	0	0	0
B79	0	0	0	10	0	0	3	0	38	0	0	0	0	0	0	134	3	0	10	0	0	0	3	0	0	9	27	1	1	0	46	0	28	0	1	2	0	0	1	0	0	8	0	6	3	0	0	0	1
B89	0	0	1	8	0	0	5	0	14	0	1	0	0	0	0	8	2	0	0	0	0	0	1	0	0	2	1	0	0	0	6	1	3	1	2	0	0	0	0	0	0	1	0	4	0	0	0	0	1
B48	0	0	1	19	0	0	17	0	40	0	0	0	1	0	0	32	0	0	3	0	0	0	5	0	0	99	4	2	0	0	5	0	3	0	9	0	0	0	0	0	0	16	0	46	0	0	0	0	1
B47B	1	0	5	16	0	0	4	1	17	0	1	0	1	0	0	18	1	0	0	0	0	0	0	0	0	17	3	3	0	1	9	1	8	0	6	0	0	0	0	0	3	12	0	5	0	0	0	0	2
B46	0	0	2	81	0	0	8	0	39	0	0	0	3	0	0	109	1	0	1	0	0	0	4	0	0	17	25	1	1	0	45	0	14	0	10	1	1	0	2	0	0	5	0	22	0	0	0	4	0
B45	1	0	0	22	0	0	10	0	40	0	0	0	0	0	0	91	4	2	4	0	0	0	1	0	0	19	24	3	0	0	37	0	18	0	3	0	0	0	1	0	0	7	0	15	4	0	0	1	0
B78	0	0	2	28	0	0	10	0	38	0	0	0	1	0	0	111	5	0	13	0	0	0	1	0	0	21	13	0	0	0	17	0	19	0	0	0	0	0	2	0	0	11	0	7	12	1	0	0	0
B44	0	0	0	33	0	2	8	0	30	0	0	0	0	0	0	107	4	0	20	0	0	0	0	0	0	11	6	0	0	0	6	0	13	0	0	0	0	0	1	0	0	4	0	3	3	0	0	0	0
B88	0	0	0	7	0	0	0	0	7	0	0	0	0	0	0	3	1	0	0	0	0	0	0	0	0	3	2	0	0	0	1	0	1	0	3	0	0	0	2	0	0	0	0	1	0	1	0	0	0
B31	1	0	1	30	0	0	8	1	14	0	0	1	0	0	0	17	2	0	0	0	0	0	2	0	0	25	12	0	0	0	11	0	9	0	3	0	0	0	1	0	1	24	0	17	0	0	0	0	0
B32	0	3	3	37	0	0	9	0	18	0	0	0	0	0	0	37	5	0	2	0	0	0	0	0	0	19	13	4	0	0	12	0	17	1	7	1	0	0	2	0	4	20	0	10	0	0	0	0	1
B35	0	0	3	15	0	0	0	0	14	0	0	0	0	0	0	134	2	2	15	0	0	0	0	0	0	5	3	0	1	0	12	0	9	0	0	0	0	0	0	0	0	6	0	3	6	1	1	0	0
B87	2	1	2	18	0	0	6	4	59	0	0	0	0	0	3	28	0	1	2	0	0	0	0	0	0	6	11	1	0	0	8	1	9	0	3	0	0	0	3	0	1	4	0	10	0	0	1	0	15
B30	2	1	0	15	0	0	0	0	9	0	0	0	0	3	0	12	0	0	5	0	0	0	0	0	0	4	2	1	0	0	3	0	5	1	1	0	0	0	0	0	0	9	0	10	1	2	0	0	4
B29	0	4	2	31	0	0	19	0	19	0	2	0	1	0	0	31	2	2	0	0	0	0	2	0	14	19	4	0	1	0	4	0	12	0	6	0	0	0	1	0	0	26	0	3	1	1	2	0	1
B28	6	1	0	17	3	0	13	0	14	0	0	0	0	1	0	15	3	2	1	0	0	0	2	1	8	1	14	0	0	0	15	0	8	0	3	0	0	0	4	0	0	5	0	0	0	0	0	0	0
B27	6	2	3	44	14	2	13	0	38	0	1	0	7	2	0	90	0	0	9	0	0	0	1	2	38	20	36	3	0	0	66	0	22	0	15	0	0	0	2	0	2	7	0	17	7	0	0	1	0
B86	1	1	0	6	3	0	11	1	26	1	0	0	0	0	0	10	0	1	0	0	0	0	0	0	2	0	7	0	0	0	7	0	1	0	4	0	3	0	2	0	1	3	0	1	0	1	0	0	14
B16	1	1	3	23	9	0	13	0	14	0	1	0	0	2	0	22	0	0	4	0	0	0	0	0	11	7	5	0	0	0	2	0	8	0	7	0	2	0	3	0	8	13	0	8	0	0	0	0	4
B17	0	5	6	52	13	0	30	0	31	0	0	0	0	0	0	38	4	0	8	0	0	0	0	0	27	15	13	1	0	0	9	0	4	4	16	0	0	0	1	0	9	50	0	6	0	0	0	0	3
B18	1	0	0	6	2	0	5	0	7	0	0	0	0	1	0	10	1	0	0	0	0	0	0	0	3	3	4	3	0	0	7	0	5	0	6	1	0	0	0	0	0	8	0	0	0	0	0	0	1
B19	0	2	0	24	11	0	11	0	14	0	0	0	0	0	0	40	2	0	6	0	0	0	0	0	29	11	28	1	0	0	41	0	12	0	9	0	1	0	5	0	0	0	0	2	3	0	0	0	0
B76	0	2	0	42	17	0	13	0	33	0	0	0	0	0	0	81	0	0	9	0	0	0	2	0	29	10	33	4	0	0	43	0	30	0	12	0	0	0	10	0	0	4	0	3	1	0	0	0	1
B77A	4	0	1	24	18	2	12	0	27	0	0	0	0	0	0	68	3	0	3	0	0	0	0	0	8	6	13	3	0	0	12	0	29	0	0	0	0	0	0	0	0	7	0	4	3	0	0	0	0
B85	0	0	0	5	0	0	3	0	0	0	0	0	0	0	0	1	0	0	0	0	0	0	0	0	1	0	1	0	0	0	3	0	0	0	1	0	0	0	1	0	0	0	0	0	0	0	0	0	0
B15	1	3	4	16	7	0	7	0	12	0	0	0	0	0	0	9	0	0	1	0	0	0	0	0	3	2	7	2	0	0	15	0	2	0	5	1	1	0	3	0	2	9	0	5	0	0	0	0	4
B14	1	2	1	29	11	0	15	0	26	0	2	0	0	1	0	8	1	2	0	0	0	0	0	0	21	8	5	0	0	0	13	0	2	1	8	1	0	0	6	0	2	8	0	2	1	0	0	0	0
B13	0	0	0	4	3	0	4	0	5	0	2	0	0	0	0	7	0	0	2	0	0	0	0	0	3	0	2	1	0	0	2	0	4	0	5	0	0	0	1	0	0	5	0	0	0	0	0	0	0
B12	3	0	2	19	11	1	10	0	36	0	1	0	0	0	0	76	2	1	4	0	0	0	0	0	14	5	14	2	0	0	25	0	23	0	6	0	1	0	1	0	0	5	0	6	0	0	0	0	1
B11	2	0	0	9	9	0	4	0	28	0	0	0	0	0	0	50	2	0	16	0	0	0	0	0	13	6	21	0	0	0	25	0	9	0	1	0	0	0	2	0	0	9	0	1	0	0	0	0	0
B84	1	1	2	12	3	0	3	0	8	0	1	0	0	0	0	7	2	0	1	0	0	0	0	0	0	1	5	1	0	0	9	0	3	0	1	0	0	0	1	0	0	2	0	0	0	0	0	0	0
B1	0	2	2	13	12	0	0	0	10	0	2	0	0	0	0	9	0	0	3	0	0	0	0	0	2	5	10	1	0	0	4	0	5	0	6	0	3	0	3	0	0	3	0	1	0	0	0	0	0
B2	0	0	2	7	3	0	3	0	4	0	1	0	0	0	0	2	0	0	0	0	0	0	0	0	4	3	4	0	0	0	2	0	2	0	2	0	1	0	0	0	0	2	0	2	0	0	0	0	1
B3	1	4	33	4	33	0	15	0	24	0	3	0	0	0	0	43	0	0	4	0	0	0	0	0	22	34	10	4	0	0	8	0	14	2	9	0	2	0	4	0	0	11	0	6	0	0	0	0	0
B4	4	2	7	40	36	0	14	0	35	0	4	0	0	0	0	61	2	0	4	0	0	1	0	3	14	10	10	2	0	0	17	0	18	1	10	1	0	1	2	0	0	8	0	3	0	0	0	0	0
B5	2	1	0	24	9	1	9	0	19	0	1	0	1	0	0	51	0	1	6	0	0	0	0	0	6	10	16	1	0	0	6	0	13	0	4	0	0	0	1	0	0	8	0	6	0	0	0	0	0
B75	2	0	0	27	14	0	6	0	18	0	0	0	0	0	0	89	0	0	10	0	0	0	0	0	10	4	11	0	0	0	11	0	23	0	2	0	0	0	1	0	0	5	0	2	0	0	0	0	0
[truncated: 23 more columns]
